# Supplementary material for: Tuning charge transfer efficiency by functionalizing ligands in FAPbBr3 nanocrystals and graphene heterostructures
Source: Royal Society of Chemistry journal article supplement (doi:10.1039/d3cp00947e), 2023-01-01
Supplement: d3cp00947e1.pdf [file d3cp00947e1.pdf]

## Supporting Information for

### Tuning the Charge Transfer Efficiency by Functionalizing Ligands in FAPbBr<sub>3</sub> Nanocrystals and Graphene Heterostructures

Maria Mukhtar<sup>1,2</sup>, Muhammad Mubeen<sup>1</sup>, Anwar Ul-Hamid<sup>3</sup>, Sule Erten Ela<sup>2</sup>, Azhar Iqbal<sup>1\*</sup>

<sup>1</sup>Department of Chemistry, Quaid-i-Azam University, Islamabad-45320, Pakistan

<sup>2</sup>Solar Energy Institute, Ege University, Izmir-35100, Turkey

<sup>3</sup>Core Research Facilities, King Fahd University of Petroleum & Minerals, Dhahran 31261, Saudi Arabia

\*Correspondence should be addressed to Dr. Azhar Iqbal, Email, [aiqbal@qau.edu.pk](mailto:aiqbal@qau.edu.pk)

Table S1: EDX analysis and percentage elemental composition of functionalized graphene.

| Sample code | C      |          | O      |          | N      |          | S      |          |
|-------------|--------|----------|--------|----------|--------|----------|--------|----------|
|             | Atom % | Weight % |
| GO          | 54.41  | 50.01    | 45.59  | 49.99    | -      | -        | -      | -        |
| GO-Ala      | 65.13  | 59.12    | 33.18  | 27.44    | 7.43   | 7.70     | -      | -        |
| GO-Tyr      | 56.03  | 50.32    | 41.28  | 35.79    | 8.18   | 8.39     | -      | -        |
| GO-Cys      | 58.47  | 63.63    | 35.10  | 28.67    | 5.15   | 4.19     | 2.78   | 1.28     |

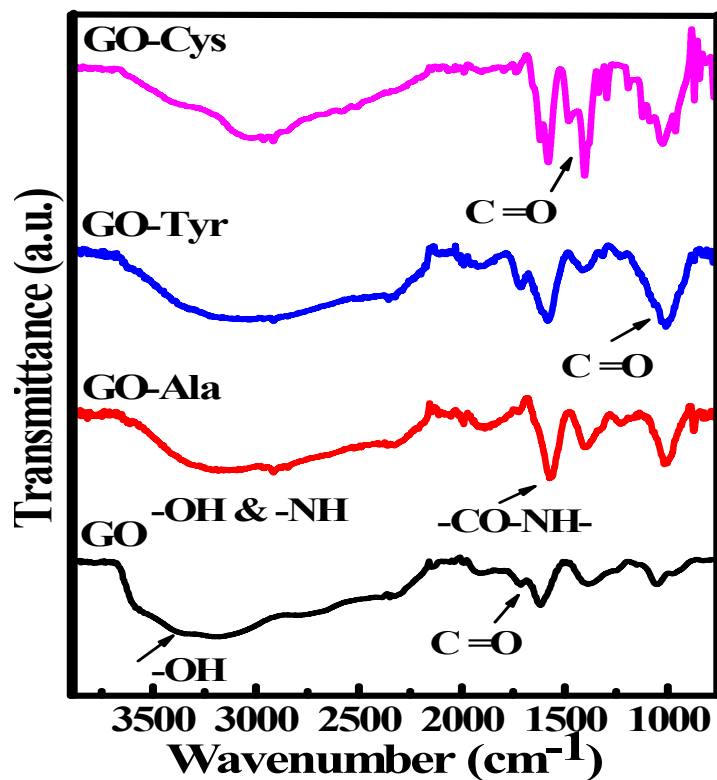

**Figure S1:** FTIR spectra of GO, GO-Ala, GO-Tyr, and GO-Cys.

**Table S2.** Vibrational modes observed in functionalized graphene.

| Mode of Vibration                          | Observed Peak (cm <sup>-1</sup> ) |
|--------------------------------------------|-----------------------------------|
| Stretching vibrations of O-H and -NH group | 3300                              |
| Stretching vibrations of C=O               | 1718                              |
| Bending vibrations of C=O                  | 1017                              |
| Stretching vibration of C=O                | 1590                              |
| asymmetric -NH <sub>2</sub> stretching     | 871                               |

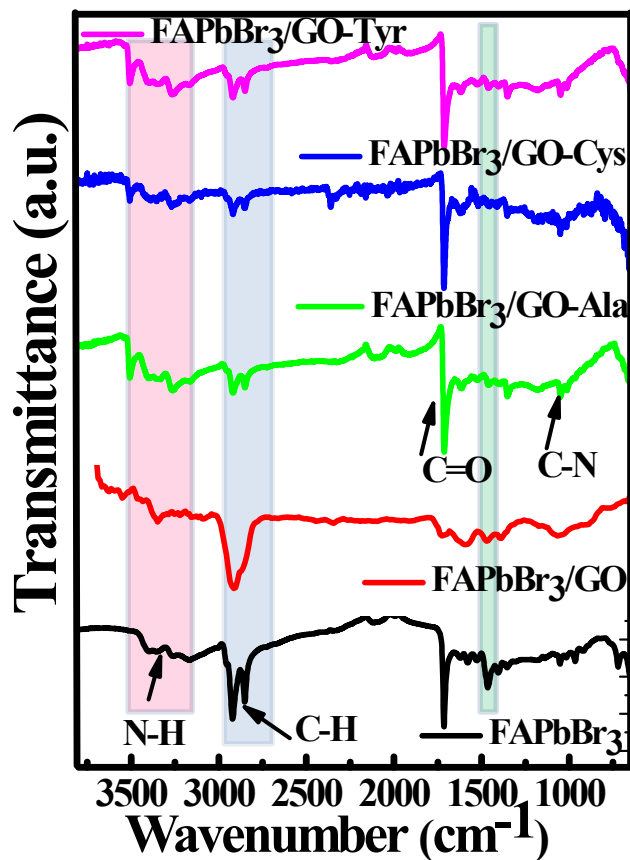

**Figure S2:** FTIR spectra of FAPbBr<sub>3</sub> NCs and NCs/functionalized graphene (GO, GO-Ala, GO-Cys, and GO-Tyr) heterostructures.

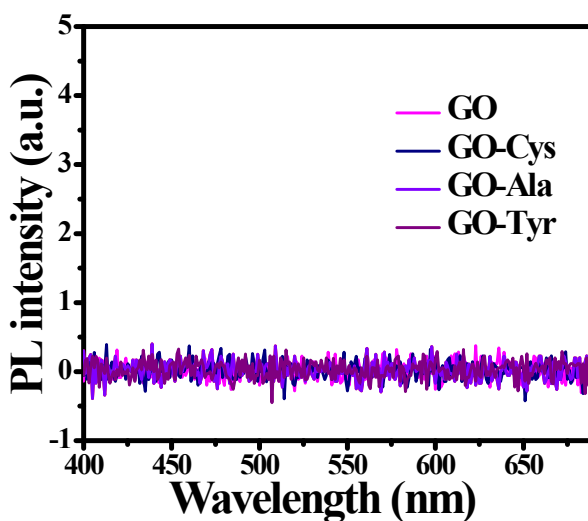

**Figure S3:** PL spectra of GO, GO-Cys, GO-Ala, and GO-Tyr indicating the non-emissive nature of these compounds.

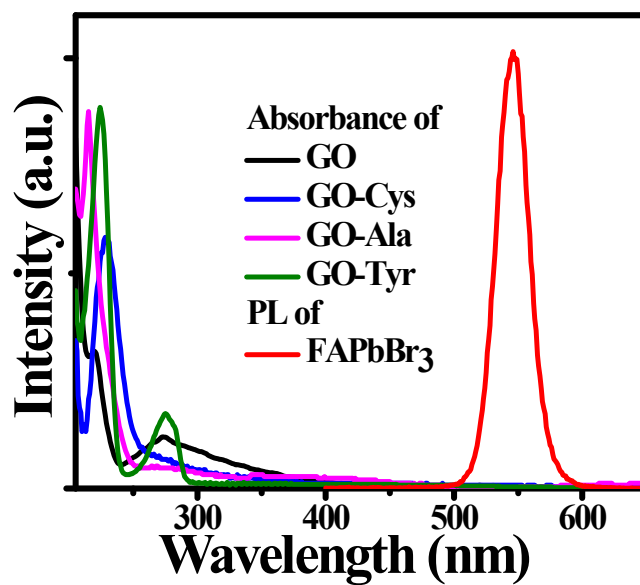

**Figure S4.** PL spectrum of FAPbBr<sub>3</sub> NCs in toluene solvent and UV-Vis absorption spectra of GO, GO-Cys, GO-Ala, and GO-Tyr in water.

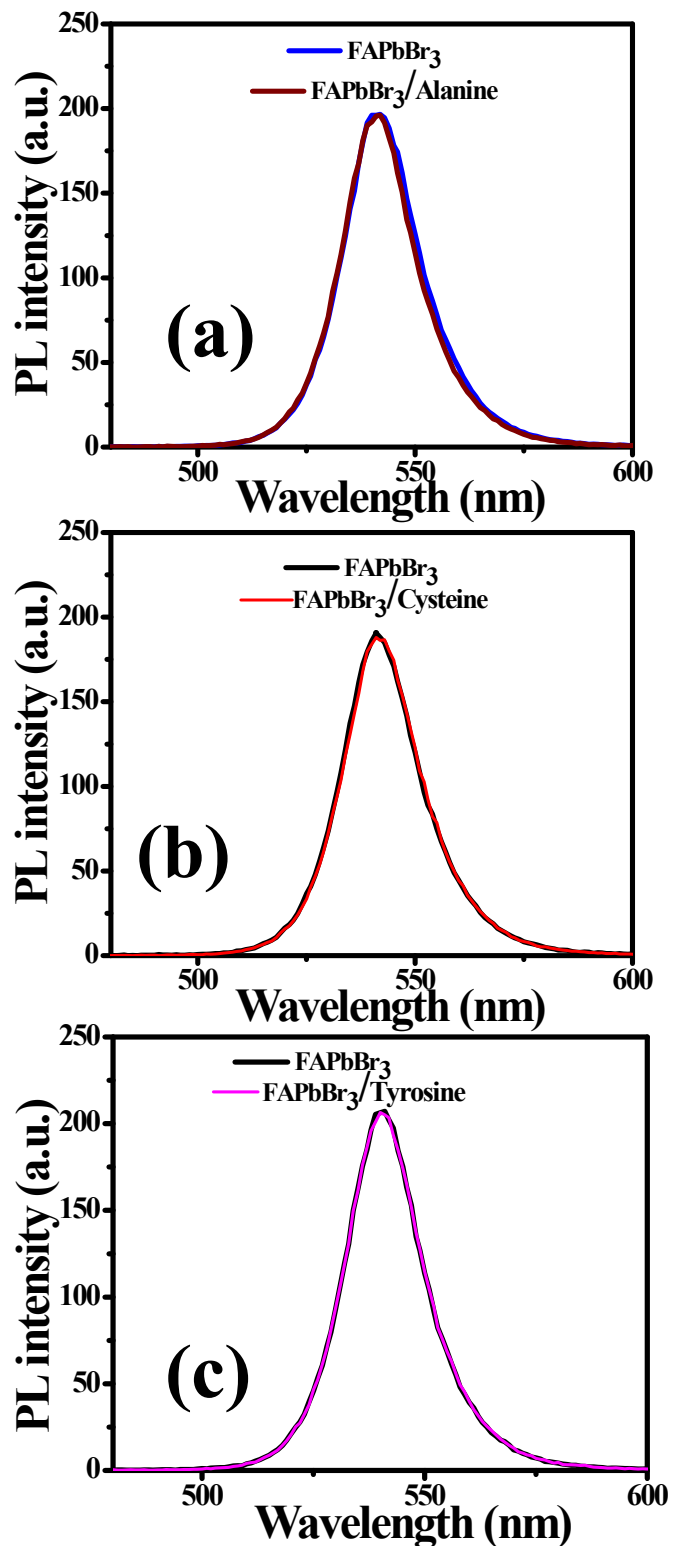

**Figure S 5.** (a) The PL spectra FAPbBr<sub>3</sub> NCs in toluene solution in the absence and presence of different amino acids (a) Alanine, (b) Cysteine, and (c) Tyrosine. The spectra is measured after excitation at 306 nm.

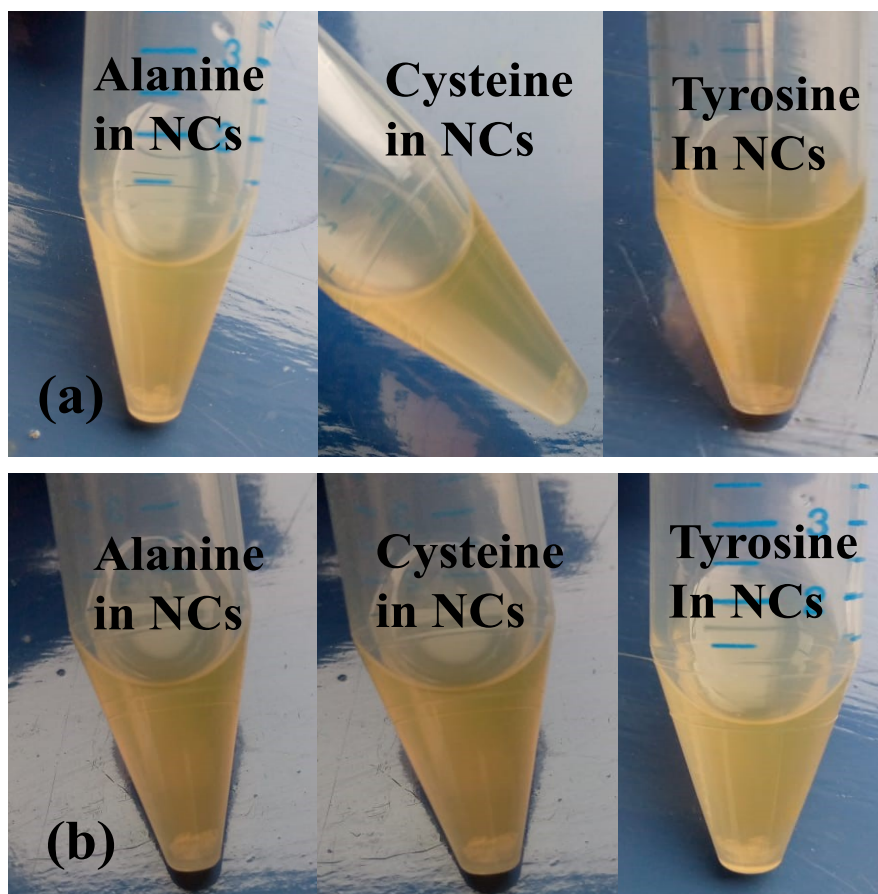

**Figure S 6.** Amino acids (Alanine, Cysteine, and Tyrosine) in the solution of NCs in toluene, (a) Before stirring and (b) After a stirring of half an hour.

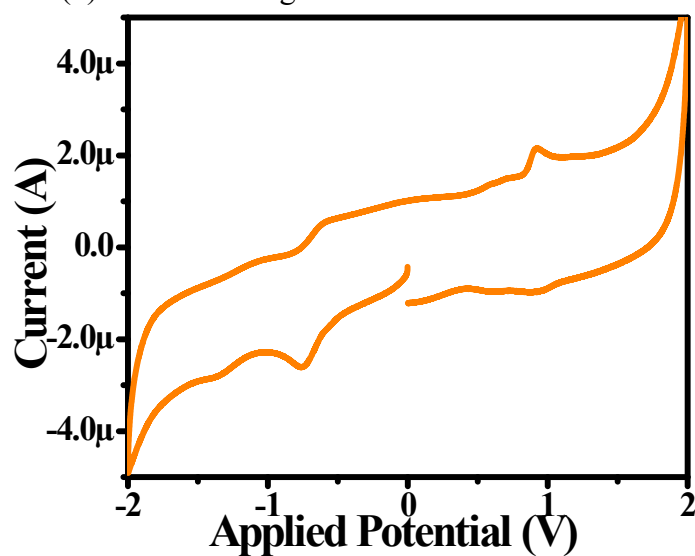

**Figure S7.** CV of FAPbBr<sub>3</sub> NCs with supporting electrolyte of TBAPF<sub>6</sub> (50 mM) in toluene:acetonitrile (4:1) solution.

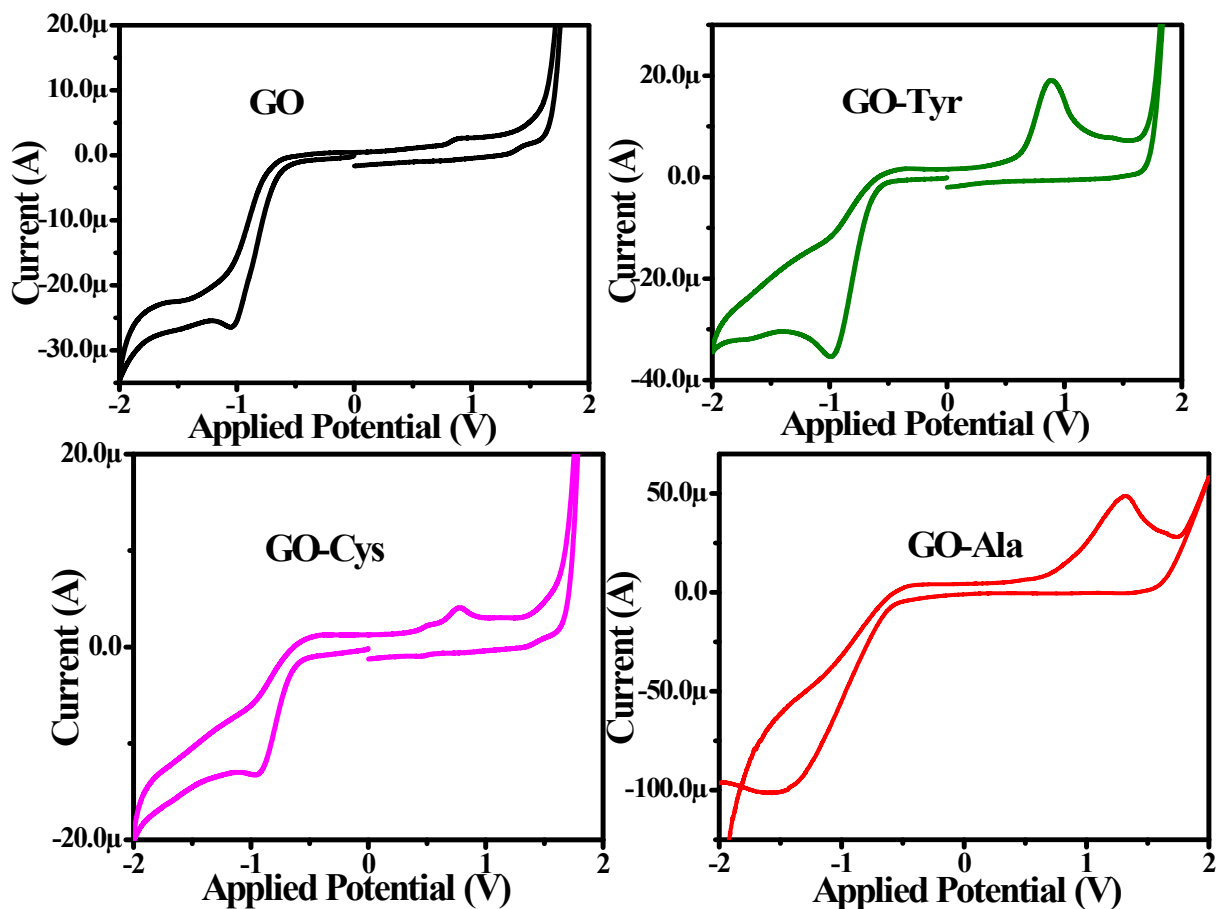

**Figure S8.** (a) CV of GO, (b) GO-Tyr, (c) GO-Cys, and (d) GO-Ala with supporting electrolyte of TBAPF<sub>6</sub> (50 mM) in toluene:acetonitrile (4:1) solution.

### Characterization of FAPbBr<sub>3</sub> NCs

Figure S 9 (a) presents the TEM micrograph of the NCs indicating the spherical morphology of the synthesized NCs, while Figure S 9 (b) represents the HRTEM micrograph of the NCs consisting a fringe spacing of 0.22 nm that is assigned to the (211) reflection plane of the cubic crystal. In figure S 9(c), SAED pattern displays the bright circular rings suggesting the crystallinity of the samples. The XRD pattern of the prepared NCs (figure S 9(d)) is well indexed with the cubic crystalline phase of FAPbBr<sub>3</sub>. The UV-Vis absorption and PL spectrum of the NCs is displayed in figure S10. The UV-Vis absorption spectrum exhibits an excitonic peak at 532 nm

and Stokes shifted PL at 544 nm. The results of the NCs are well matched with the previous report<sup>1</sup> and hence confirm the successful formation of NCs.

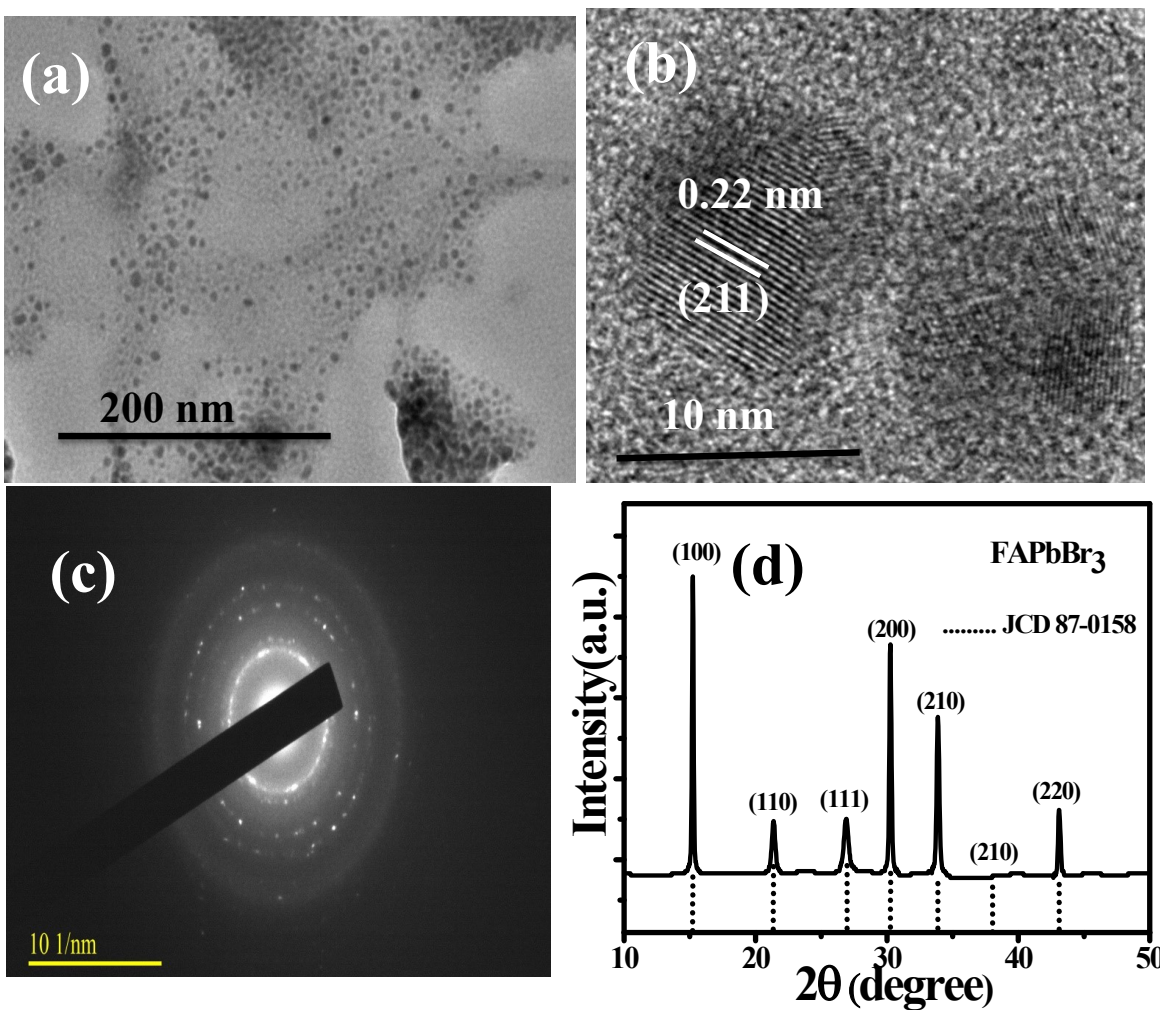

**Figure S9.** (a) TEM micrograph, (b) High-resolution TEM micrograph (c) SAED pattern and (d) XRD pattern of FAPbBr<sub>3</sub> NCs.



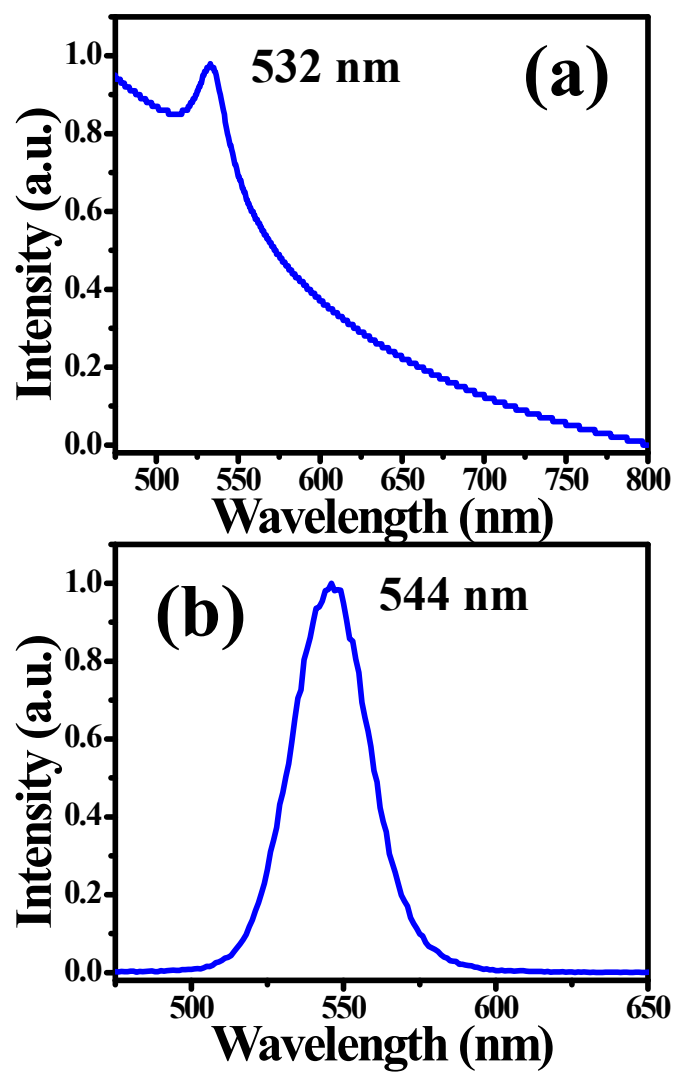

**Figure S 10.** (a) UV-Vis absorption and (b) PL spectra of 1 g/L solution of FAPbBr<sub>3</sub> NCs in toluene.

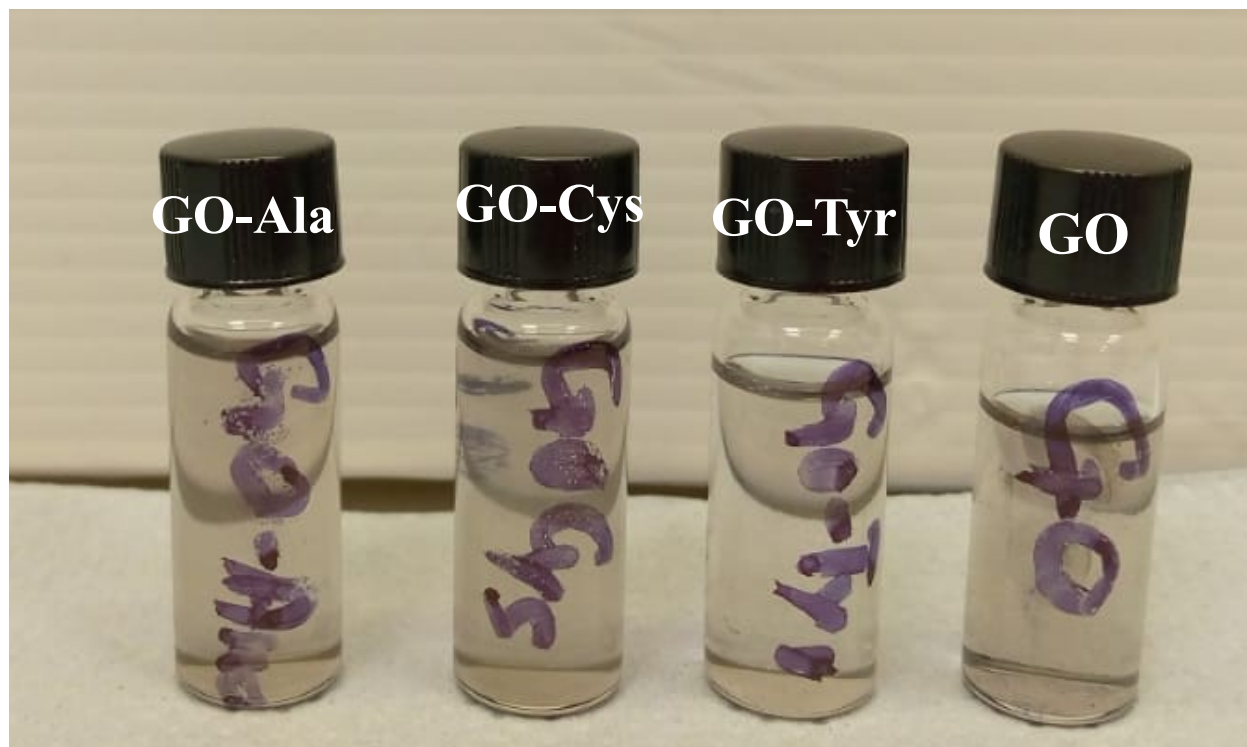

**Figure S 11.** (a) 0.1 mg/mL dispersion of GO, GO-Ala, GO-Tyr, and GO-Cys in toluene.

## References

- 1 F. Di Stasio, I. Ramiro, Y. Bi, S. Christodoulou, A. Stavrinadis and G. Konstantatos, *Chem. Mater.*, 2018, **30**, 6231–6235.
